# Supplementary material
Source: Royal Society of Chemistry journal article supplement (doi:10.1039/d6nr00994h)
Supplement: d6nr00994h1.pdf [file d6nr00994h1.pdf]

**Supplementary Information of**  
**Tunable Opto-Magnetic Metamaterials via Coupled TiN-NiO Vertically Aligned**  
**Nanocomposite Thin Films**

Natalia Garcia Godinez<sup>1</sup>, Jiawei Song<sup>1</sup>, Yizhi Zhang<sup>1</sup>, Amirr Dion Neal<sup>1</sup>, Claire Mihalko<sup>1</sup>,  
Lizabeth Quigley<sup>1</sup>, Juanjuan Lu<sup>1</sup>, Ping Lu<sup>2,3</sup>, Haiyan Wang<sup>1,4</sup>

<sup>1</sup> School of Materials Engineering, Purdue University, West Lafayette, Indiana 47907, USA

<sup>2</sup> Sandia National Laboratory, Albuquerque, New Mexico 87185, USA

<sup>3</sup> Center for Integrated Nanotechnologies, Sandia National Laboratories, Albuquerque, New  
Mexico 87185, USA

<sup>4</sup> School of Electrical and Computer Engineering, Purdue University, West Lafayette, Indiana  
47907, USA

\*Corresponding author: [hwang00@purdue.edu](mailto:hwang00@purdue.edu)

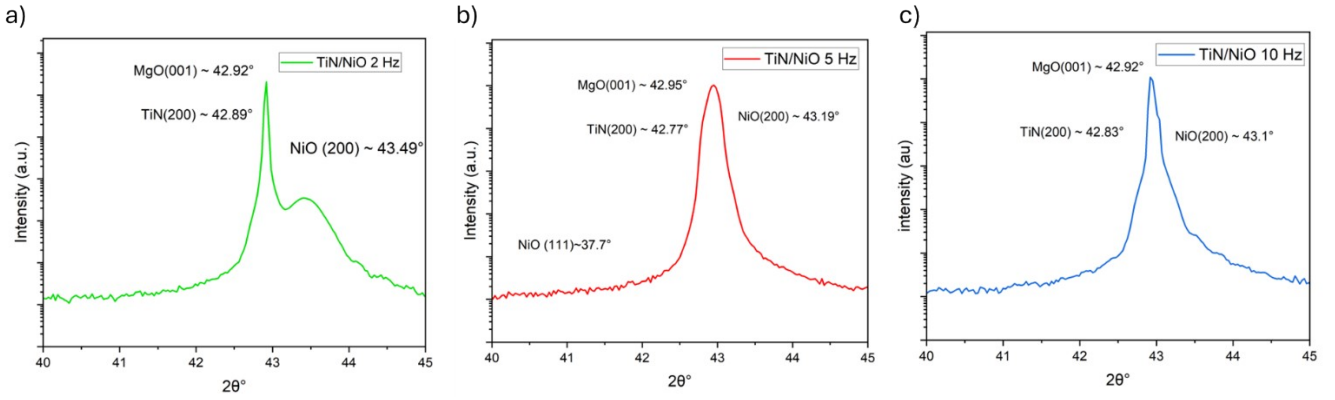

Supplementary Figure 1 X-ray diffraction (XRD) peak positions TiN-NiO thin films deposited at laser frequency of a) 2 Hz, b) 5 Hz, and c) 10 Hz on single-crystal MgO substrate.

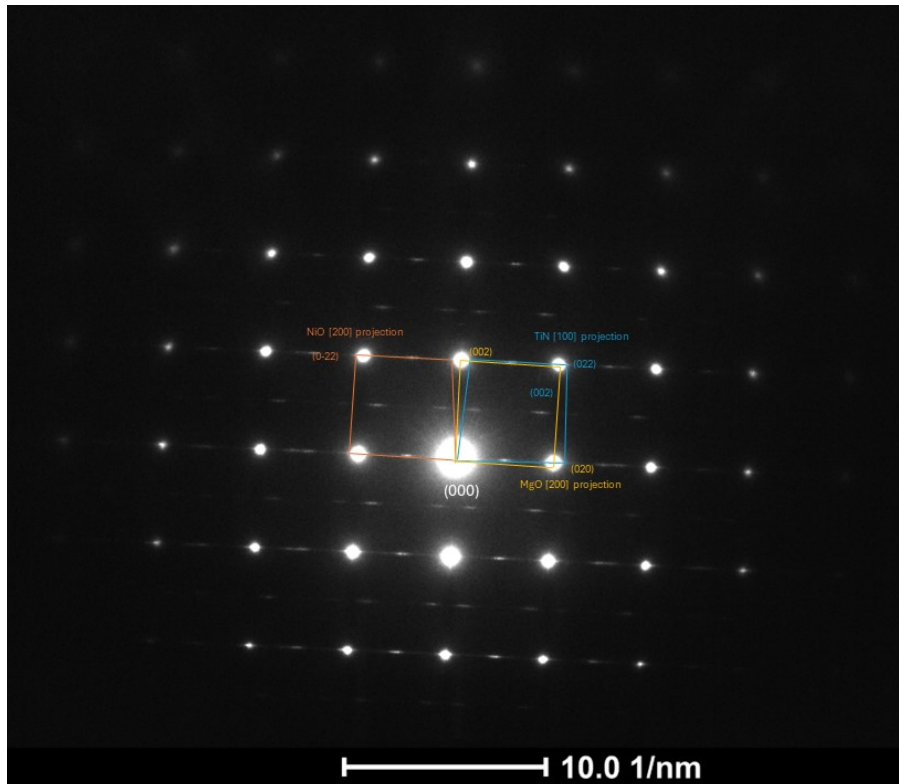

Supplementary Figure 2 Selected area electron diffraction (SAED) pattern of the TiN-NiO thin film deposited at a laser frequency of 5 Hz on an MgO substrate, showing the diffraction spots from the TiN matrix, NiO phase, and single-crystal MgO substrate, indicative of epitaxial or highly textured growth.

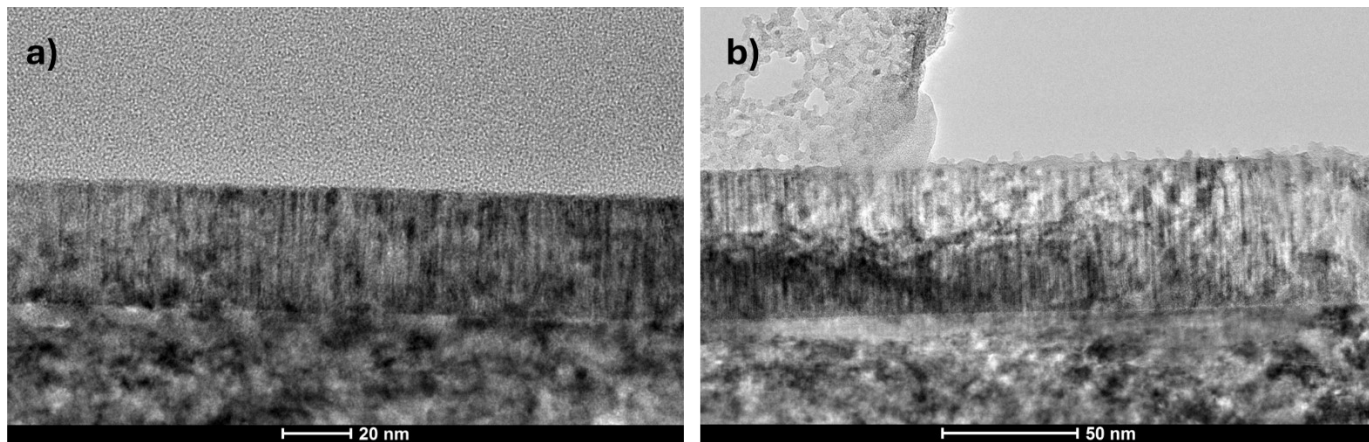

Supplementary Figure 3 Cross-section TEM images of TiN-NiO deposited at a) 5 Hz, and c) 2 Hz.

Table S1 Film thickness and estimated pillar areal density as a function of pulsed laser repetition rate.

| Laser frequency (Hz) | Thickness (nm) | Estimated pillar areal density                |
|----------------------|----------------|-----------------------------------------------|
| 2                    | 37             | $3.3 \times 10^{12}$ pillars·cm <sup>-2</sup> |
| 5                    | 56             | $4.8 \times 10^{12}$ pillars·cm <sup>-2</sup> |
| 10                   | 38             | $5.9 \times 10^{12}$ pillars·cm <sup>-2</sup> |

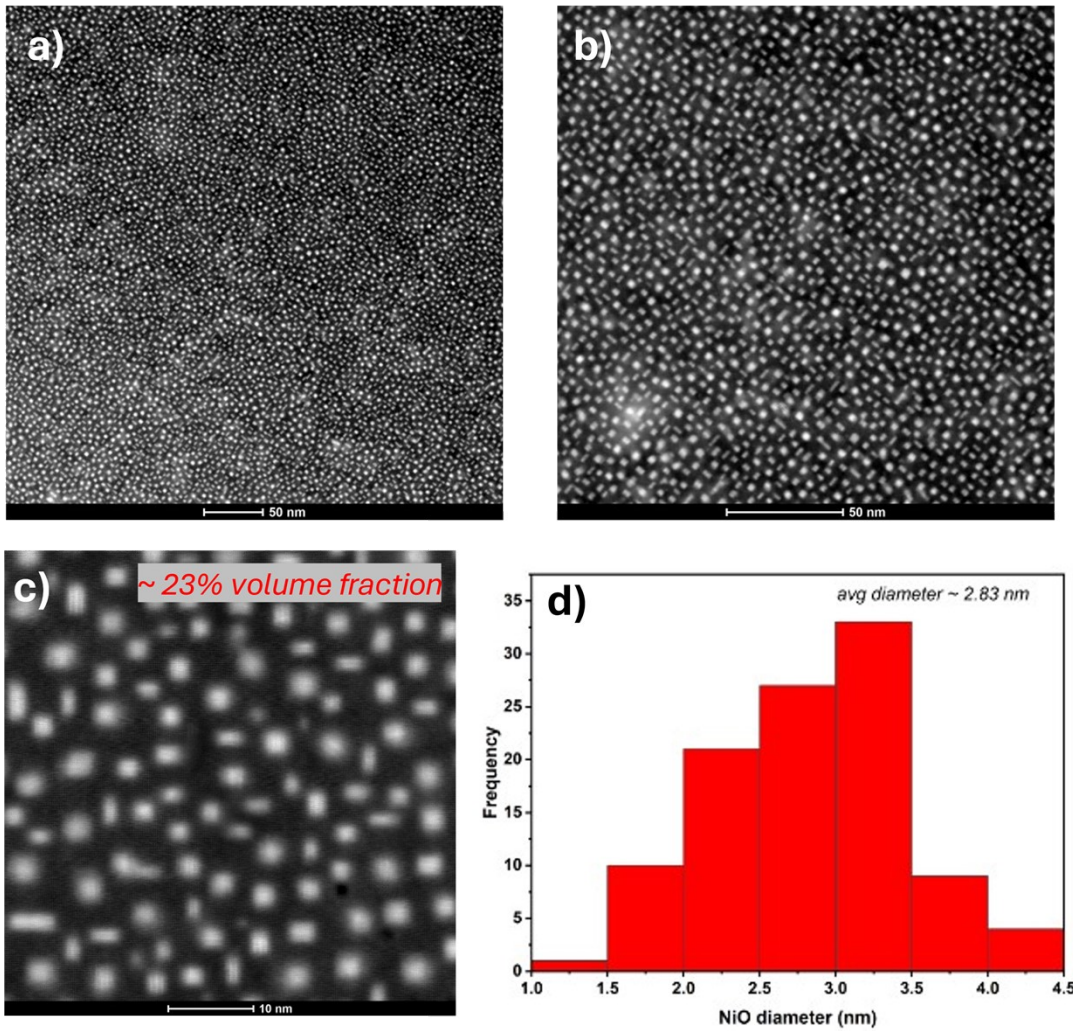

Supplementary Figure 4 Plan-view TEM image of TiN-NiO thin film deposited at 5 Hz shown at a) low magnification, b) medium magnification, and c) high magnification, including a d) histogram of pillar diameter.

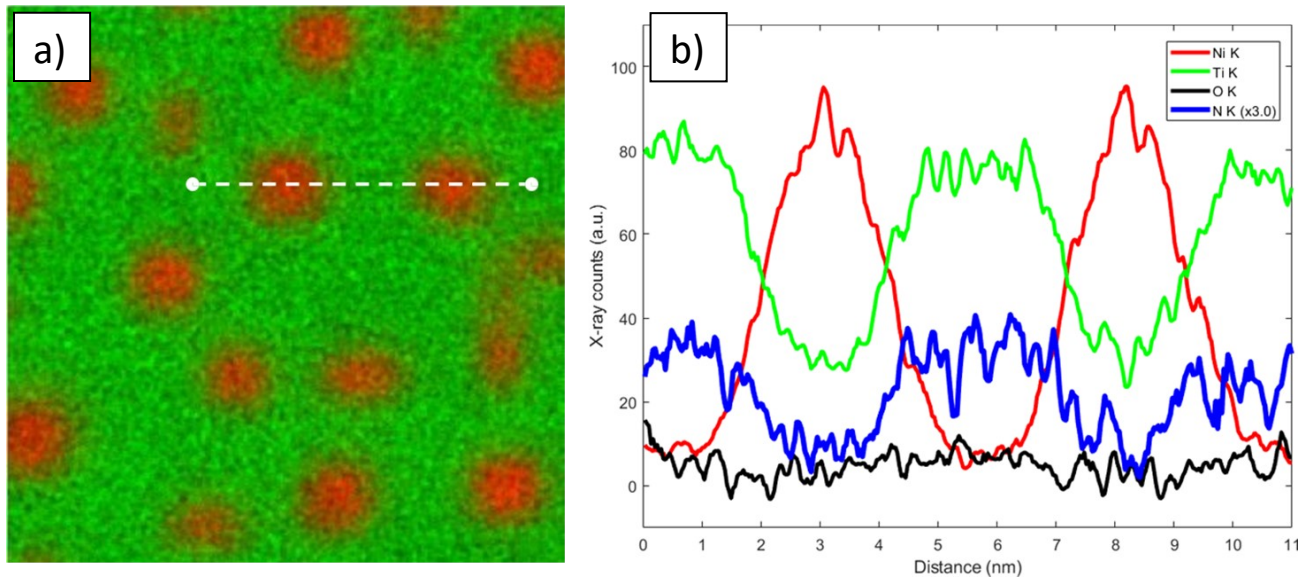

Supplementary Figure 5 a) EDS mapping of TiN matrix (green) and NiO (red) b) EDS line profiles of Ni, Ti, O, and N.

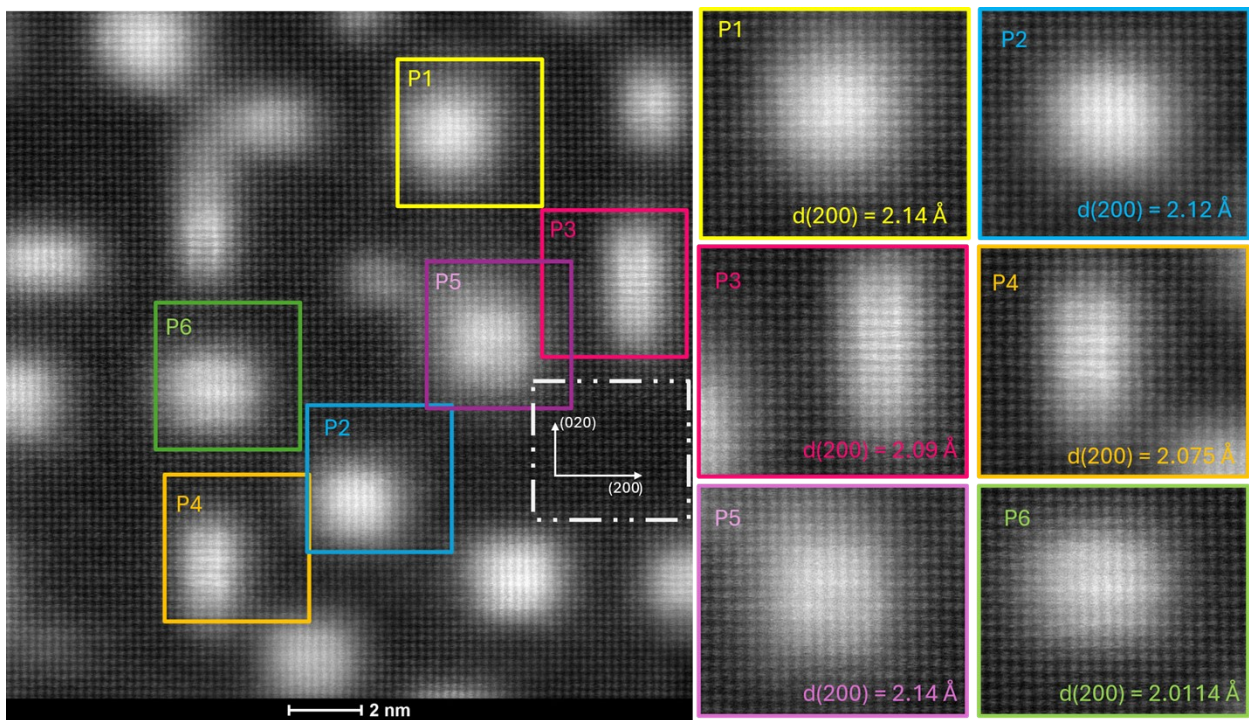

Supplementary Figure 6 Plan-view HRTEM lattice-fringe analysis of multiple NiO pillar regions in TiN matrix deposited at a laser frequency of 5 Hz (P1-6). Measurements were averaged over 7-15 consecutive lattice fringes per region of interest. The white border ROI represents the TiN matrix.

Table S2. In-plane lattice spacings measured from plan-view HRTEM.

| Pillar (#) | $d_{(200)}$ (Å) | $d_{(020)}$ (Å) | $a_{(200)}$ (Å) | $a_{(020)}$ (Å) |
|------------|-----------------|-----------------|-----------------|-----------------|
| P1         | 2.148           | 2.059           | 4.297           | 4.11            |
| P2         | 2.125           | 2.006           | 4.250           | 4.013           |
| P3         | 2.096           | 2.042           | 4.193           | 4.084           |
| P4         | 2.075           | 2.073           | 4.150           | 4.146           |
| P5         | 2.140           | 2.064           | 4.285           | 4.129           |
| P6         | 2.114           | 2.0125          | 4.229           | 4.025           |

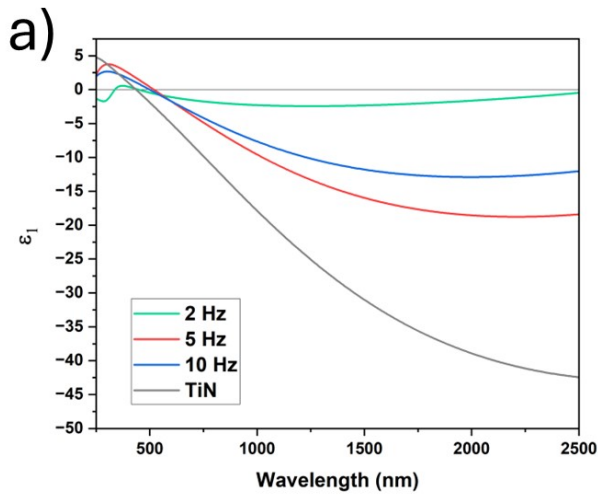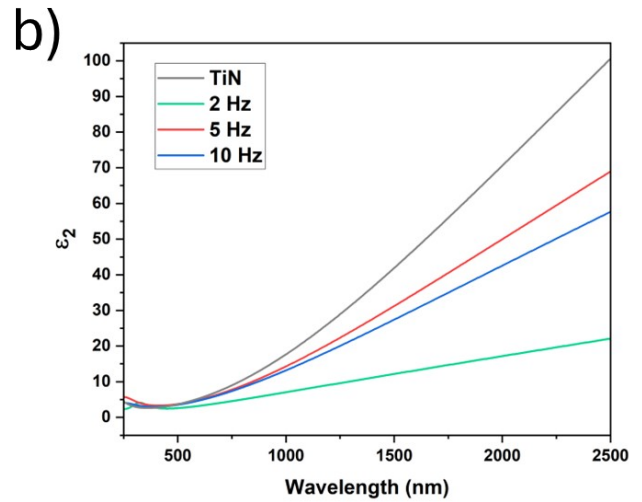

Supplementary Figure 7 In plane a) real and (b) imaginary part of the permittivity as a function of wavelength for TiN-NiO films deposited at laser frequency of 2, 5, and 10 Hz compared against a pure TiN thin film used as reference.

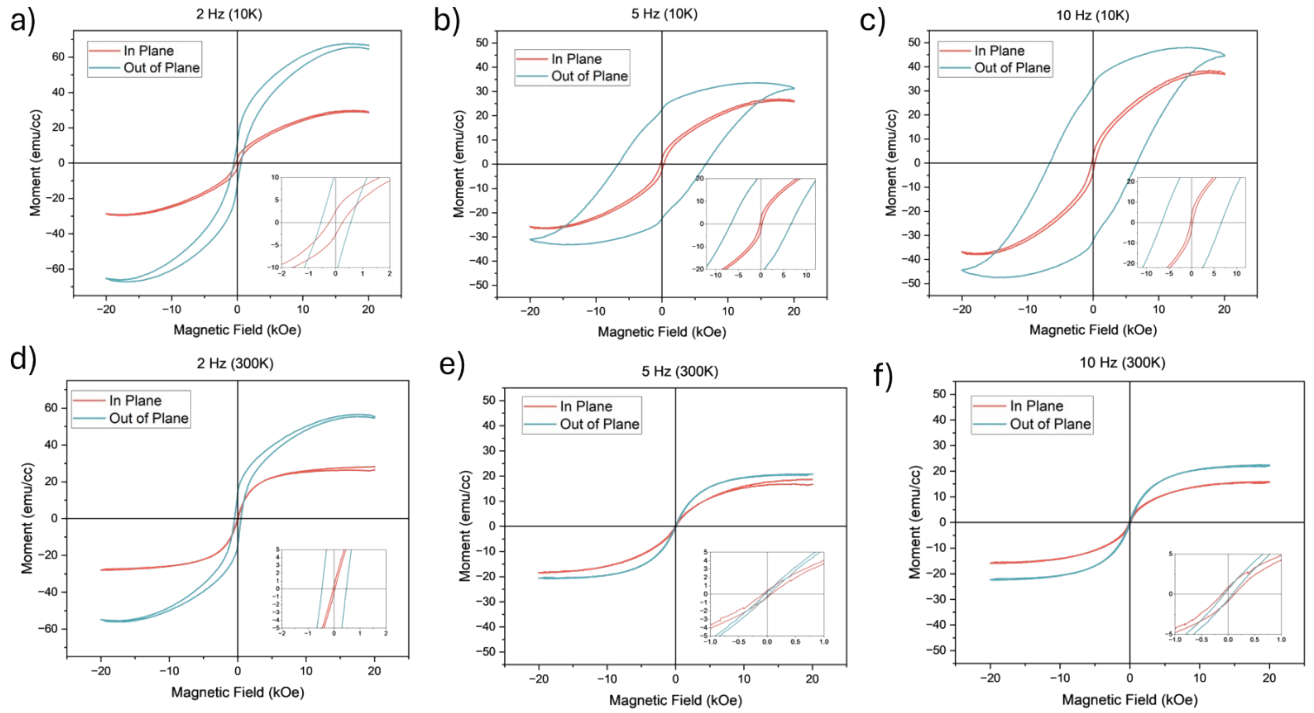

Supplementary Figure 8 Magnetic hysteresis loops of the TiN-NiO thin film deposited at laser frequencies of a) 2 Hz, b) 5 Hz, and 10 Hz measured at 10K and d) 2 Hz, e) 5 Hz, and f) 10 Hz measured at 300K.

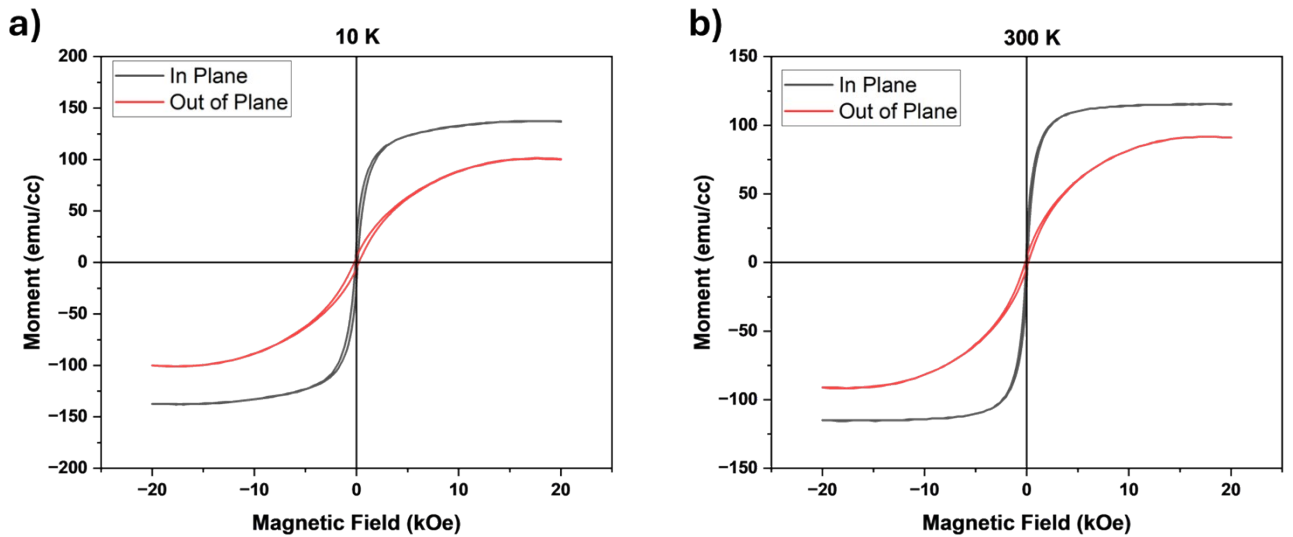

Supplementary Figure 9 Magnetic hysteresis loops of TiN on MgO as a baseline measurement measured at a) 10 K, and b) 300 K

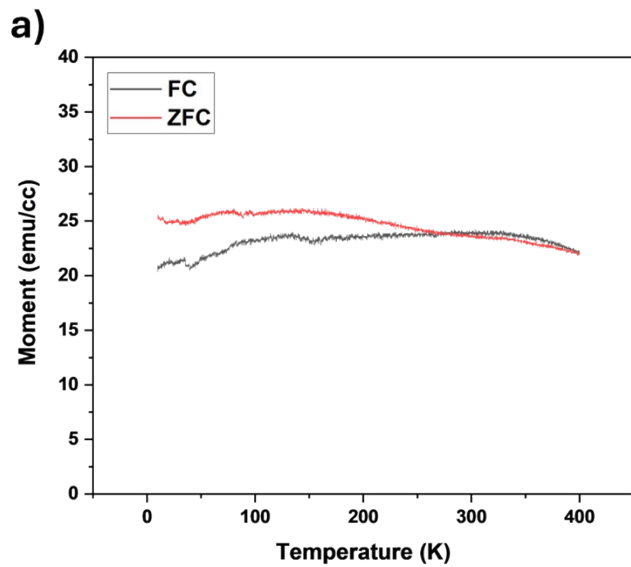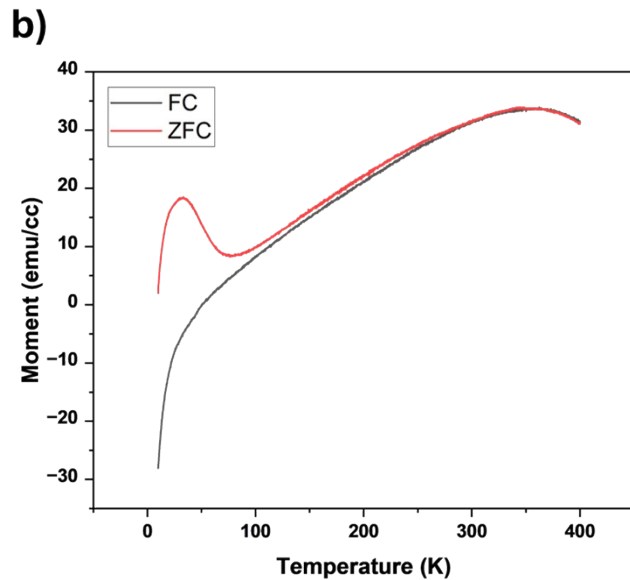

Supplementary Figure 10 Field-cooled (FC) and zero-field-cooled (ZFC) magnetization as a function of temperature for TiN-NiO thin film deposited at a) 5 Hz and b) 10 Hz, measured under a constant applied magnetic field.
